# Supplementary material for: Ryk cooperates with Frizzled 7 to promote Wnt11-mediated endocytosis and is essential for Xenopus laevis convergent extension movements
Source: PubMed Central journal article supplement — J Cell Biol. 2008 Sep 22;182(6):1073–82. doi: 10.1083/jcb.200710188 (PMC2542470; doi:10.1083/jcb.200710188), 2008-09-22
Supplement: jcb.200710188_4.pdf [file jcb.200710188_4.pdf]

Table S1. **Rescue assays between Ryk and noncanonical Wnt components**

| <b>Injected RNAs</b>                | <b>++</b> | <b>+</b> | <b>-</b> | <b>Number</b> |
|-------------------------------------|-----------|----------|----------|---------------|
| Wnt11 + XRyk MO and $\Delta$ C      |           |          |          |               |
| Uninjected                          | 96.9      | 0        | 3.1      | 32            |
| 500 pg Wnt11                        | 0         | 25       | 75       | 28            |
| 500 pg Wnt11 + 20 ng XRyk MO        | 70.6      | 14.7     | 14.7     | 34            |
| 500 pg Wnt11 + 40 ng XRyk MO        | 62.2      | 27.0     | 10.8     | 37            |
| 500 pg Wnt11 + 1 ng XRyk $\Delta$ C | 40.9      | 45.5     | 13.6     | 22            |
| XRyk + Xdd1                         |           |          |          |               |
| Uninjected                          | 77.8      | 22.2     | 0        | 45            |
| 1 ng XRyk                           | 6.9       | 24.1     | 70       | 29            |
| 1 ng XRyk + 2 ng Xdd1               | 22.5      | 32.6     | 44.9     | 49            |
| 1 ng XRyk + 3 ng Xdd1               | 51.6      | 29.0     | 19.4     | 31            |
| XRyk + DN XRhoA                     |           |          |          |               |
| Uninjected                          | 96.7      | 0        | 3.3      | 31            |
| 1 ng XRyk                           | 0         | 56.2     | 43.8     | 32            |
| 1 ng XRyk + 400 pg DN XRhoA         | 29.0      | 48.4     | 22.6     | 31            |
| XRyk + x $\beta$ arr2 MO            |           |          |          |               |
| Uninjected                          | 79.4      | 20.6     | 0        | 34            |
| 1 ng XRyk                           | 0         | 29.4     | 70.6     | 34            |
| 1 ng XRyk + 5 ng x $\beta$ arr2 MO  | 34.1      | 41.5     | 24.4     | 41            |

Each DMZ elongation assay was performed more than three times. *n*, total number of explants. ++, significant elongation (length/width ratio > 3); +, mild elongation (length/width ratio > 2); -, no or weak elongation.
